# Supplementary material
Source: HighWire-hosted journal article supplement (https://www.cmaj.ca/highwire/filestream/79558/field_highwire_adjunct_files/0/201547-image-1-at.pdf)
Supplement: 201547-image-1-at.pdf [file 201547-image-1-at.pdf]

## Appendix 1: Supplemental figure

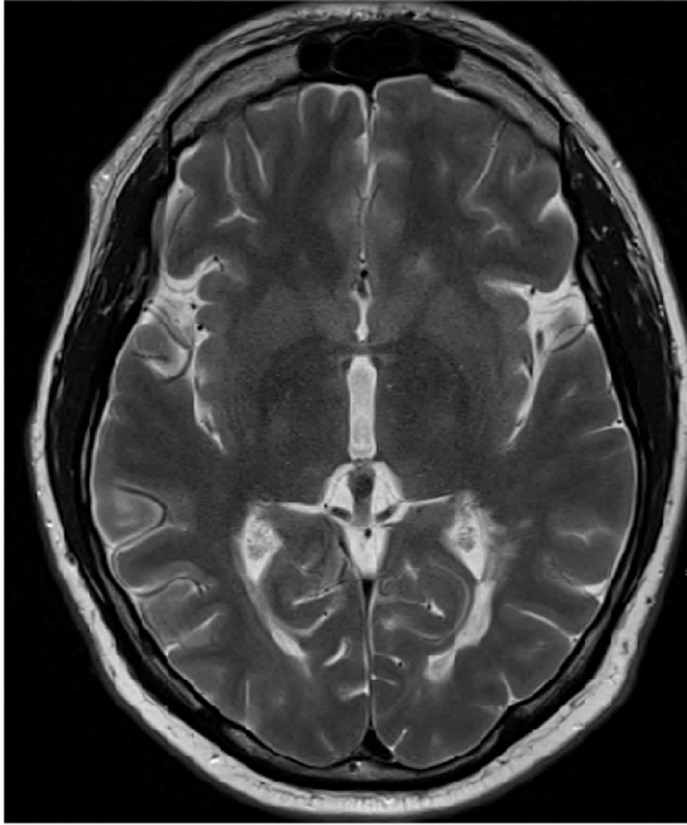

Axial  $T_2$ -weighted image at the level of the third ventricle showing normal appearance of the inferior aspect of the basal ganglia in a baseline magnetic resonance image.
